# Supplementary material
Source: PubMed Central journal article supplement (PMC6439906)
Supplement: jamadermatol-155-315-s001.pdf [file jamadermatol-155-315-s001.pdf]

## Supplementary Online Content

Barbieri JS, St Claire K, Mostaghimi A, Albrecht J. Evaluation of clinical compendia used for Medicare Part D coverage determinations for off-label prescribing in dermatology. *JAMA Dermatol*. Published online January 23, 2019. doi:10.1001/jamadermatol.2018.5052

**eTable.** Inclusion of Dermatologic Treatments in Compendia Accepted by Medicare

**eReferences.**

This supplementary material has been provided by the authors to give readers additional information about their work.

**eTable 1. Inclusion of Dermatologic Treatments in Compendia Accepted by Medicare.** The evidence grades are categorized as: A: Double-Blind Study; B: Clinical Trial ≥20 Subjects; C: Clinical Trial <20 Subjects; D: Series ≥5 Subjects; and E: Individual case reports amounting to published experience of fewer than five cases. E: etanercept, A: adalimumab, I: infliximab. AHFS: American Hospital Formulary Service Drug Information

| Disease (prevalence/incidence)                                                  | Disease included in DRUGDEX? | Evidence-based treatments     | Evidence grade | 1st, 2nd, or 3rd line | Disease included as indication in |                   |
|---------------------------------------------------------------------------------|------------------------------|-------------------------------|----------------|-----------------------|-----------------------------------|-------------------|
|                                                                                 |                              |                               |                |                       | DRUGDEX                           | AHFS              |
| Autoimmune progesterone dermatitis (fewer than 200 reported cases) <sup>1</sup> | No                           | Leuprolide acetate            | A              | 1                     | No                                | No                |
|                                                                                 |                              | Tamoxifen                     | D              | 1                     | No                                | No                |
|                                                                                 |                              | Danazol                       | E              | 2                     | No                                | No                |
|                                                                                 |                              | Azathioprine                  | E              | 2                     | No                                | No                |
| Behcet's syndrome (5 per 100,000) <sup>2</sup>                                  | Yes                          | Colchicine                    | A              | 1                     | Yes                               | No                |
|                                                                                 |                              | Sucralfate                    | A              | 1                     | No                                | No                |
|                                                                                 |                              | Dapsone                       | A              | 2                     | Yes                               | No                |
|                                                                                 |                              | Thalidomide                   | A              | 2                     | Yes                               | Yes               |
|                                                                                 |                              | Methotrexate                  | E              | 2                     | No                                | No                |
|                                                                                 |                              | Isotretinoin                  | E              | 3                     | No                                | No                |
|                                                                                 |                              | Interferon-alpha              | A              | 3                     | No                                | No                |
|                                                                                 |                              | Cyclosporine                  | A              | 3                     | Yes                               | No                |
|                                                                                 |                              | Azathioprine                  | A              | 3                     | No                                | No                |
|                                                                                 |                              | Cyclophosphamide              | A              | 3                     | Yes                               | No                |
|                                                                                 |                              | Chlorambucil                  | D              | 3                     | Yes                               | Yes               |
|                                                                                 |                              | Minocycline                   | C              | 3                     | No                                | No                |
|                                                                                 |                              | Penicillin                    | B              | 3                     | No                                | No                |
|                                                                                 |                              | Rebamipide                    | A              | 3                     | No                                | No                |
|                                                                                 |                              | TNF inhibitors                | A              | 3                     | Yes (E, A, I) - if ocular         | Yes (I), No (E,A) |
|                                                                                 |                              | Azithromycin                  | D              | 3                     | No                                | No                |
|                                                                                 |                              | Lenalidomide                  | E              | 3                     | No                                | No                |
| Apremilast                                                                      | A                            | 3                             | No             | No                    |                                   |                   |
| Bullous Pemphigoid (4 per 100,000 person-years) <sup>3</sup>                    | Yes                          | Tetracycline and nicotinamide | B              | 1                     | No                                | No                |
|                                                                                 |                              | Minocycline                   | C              | 1                     | No                                | No                |
|                                                                                 |                              | Azathioprine                  | B              | 2                     | Yes                               | No                |
|                                                                                 |                              | Mycophenolate mofetil         | B              | 2                     | No                                | No                |
|                                                                                 |                              | Dapsone                       | C              | 2                     | Yes                               | No                |

|                                                                              |     |                            |   |   |                      |            |
|------------------------------------------------------------------------------|-----|----------------------------|---|---|----------------------|------------|
|                                                                              |     | Methotrexate               | C | 2 | Yes                  | No         |
|                                                                              |     | Intravenous Immunoglobulin | C | 3 | Yes                  | No         |
|                                                                              |     | Chlorambucil               | C | 3 | No                   | No         |
|                                                                              |     | Cyclophosphamide           | E | 3 | No                   | Yes        |
|                                                                              |     | Cyclosporine               | E | 3 | No                   | No         |
|                                                                              |     | TNF inhibitors             | E | 3 | Yes (E),<br>No (A,I) | No (E,A,I) |
|                                                                              |     | Rituximab                  | E | 3 | No                   | No         |
|                                                                              |     | Daclizumab                 | E | 3 | No                   | No         |
|                                                                              |     | Omalizumab                 | E | 3 | No                   | No         |
| Cutaneous lupus / systemic lupus erythematosus (70 per 100,000) <sup>4</sup> | Yes | Hydroxychloroquine         | A | 1 | No                   | Yes        |
|                                                                              |     | Chloroquine                | B | 1 | No                   | Yes        |
|                                                                              |     | Quinacrine                 | B | 1 | No                   | No         |
|                                                                              |     | Mycophenolate mofetil      | B | 2 | Yes                  | No         |
|                                                                              |     | Methotrexate               | D | 2 | Yes                  | Yes        |
|                                                                              |     | Azathioprine               | D | 2 | Yes                  | No         |
|                                                                              |     | Dapsone                    | D | 2 | Yes                  | No         |
|                                                                              |     | Thalidomide                | B | 2 | Yes                  | Yes        |
|                                                                              |     | Lenalidomide               | C | 2 | No                   | No         |
|                                                                              |     | Acitretin                  | B | 2 | No                   | Yes        |
|                                                                              |     | Intravenous Immunoglobulin | D | 3 | Yes                  | Yes        |
|                                                                              |     | Cyclophosphamide           | D | 3 | Yes                  | Yes        |
|                                                                              |     | Rituximab                  | E | 3 | Yes                  | No         |
|                                                                              |     | Belimumab                  | E | 3 | Yes                  | Yes        |
| Dermatomyositis (22 per 100,000) <sup>5</sup>                                | Yes | Hydroxychloroquine         | D | 1 | Yes                  | No         |
|                                                                              |     | Chloroquine                | D | 1 | No                   | No         |
|                                                                              |     | Quinacrine                 | E | 1 | No                   | No         |
|                                                                              |     | Methotrexate               | A | 1 | Yes                  | Yes        |
|                                                                              |     | Mycophenolate mofetil      | B | 1 | No                   | No         |
|                                                                              |     | Azathioprine               | A | 1 | Yes                  | No         |
|                                                                              |     | Rituximab                  | A | 2 | No                   | No         |
|                                                                              |     | Intravenous Immunoglobulin | A | 2 | Yes                  | Yes        |
|                                                                              |     | Dapsone                    | E | 3 | No                   | No         |
|                                                                              |     | Thalidomide                | E | 3 | No                   | No         |
|                                                                              |     | Leflunomide                | E | 3 | No                   | No         |
|                                                                              |     | Sirolimus                  | E | 3 | No                   | No         |
|                                                                              |     | Tocilizumab                | E | 3 | No                   | No         |
|                                                                              |     | Anakinra                   | D | 3 | No                   | No         |

|                                                                                         |     |                                                                |   |   |            |            |
|-----------------------------------------------------------------------------------------|-----|----------------------------------------------------------------|---|---|------------|------------|
|                                                                                         |     | Sifalimumab                                                    | D | 3 | No         | No         |
|                                                                                         |     | Tofacitinib                                                    | D | 3 | No         | No         |
| Eosinophilic fasciitis (1.4 per 100,000) <sup>6</sup>                                   | Yes | Methotrexate                                                   | B | 1 | No         | No         |
|                                                                                         |     | Hydroxychloroquine                                             | C | 2 | No         | No         |
|                                                                                         |     | Cyclosporine                                                   | E | 2 | No         | No         |
|                                                                                         |     | Cimetidine                                                     | C | 2 | No         | No         |
|                                                                                         |     | Azathioprine                                                   | E | 3 | No         | No         |
|                                                                                         |     | Chloroquine                                                    | E | 3 | No         | No         |
|                                                                                         |     | Infliximab                                                     | E | 3 | No         | No         |
|                                                                                         |     | Rituximab                                                      | E | 3 | No         | No         |
|                                                                                         |     | Dapsone                                                        | E | 3 | No         | No         |
|                                                                                         |     | Mycophenolate mofetil                                          | E | 3 | No         | No         |
|                                                                                         |     | Tocilizumab                                                    | E | 3 | No         | No         |
| Epidermolysis bullosa acquisita (0.26 per 1,000,000 person-years) <sup>7</sup>          | Yes | Dapsone                                                        | D | 1 | No         | No         |
|                                                                                         |     | Mycophenolate mofetil                                          | E | 1 | No         | No         |
|                                                                                         |     | Intravenous Immunoglobulin                                     | D | 2 | Yes        | No         |
|                                                                                         |     | Colchicine                                                     | D | 2 | No         | No         |
|                                                                                         |     | Cyclosporine                                                   | D | 2 | Yes        | No         |
|                                                                                         |     | Rituximab                                                      | D | 3 | No         | No         |
|                                                                                         |     | Minocycline                                                    | E | 3 | No         | No         |
| Folliculitis decalvans (fewer than 300 cases reported) <sup>8</sup>                     | No  | Clindamycin and Rifampin                                       | C | 1 | No         | No         |
|                                                                                         |     | Doxycycline                                                    | C | 1 | No         | No         |
|                                                                                         |     | Azithromycin                                                   | D | 1 | No         | No         |
|                                                                                         |     | Isotretinoin                                                   | D | 2 | No         | No         |
|                                                                                         |     | Dapsone                                                        | E | 2 | No         | No         |
|                                                                                         |     | TNF inhibitors                                                 | E | 3 | No (E,A,I) | No (E,A,I) |
|                                                                                         |     | Intravenous Immunoglobulin                                     | E | 3 | No         | No         |
| Granuloma annulare (0.1-0.4% of new patients presenting to dermatologists) <sup>9</sup> | No  | Isotretinoin                                                   | C | 1 | No         | No         |
|                                                                                         |     | Acitretin                                                      | C | 1 | No         | No         |
|                                                                                         |     | Dapsone                                                        | C | 1 | Yes        | No         |
|                                                                                         |     | Hydroxychloroquine                                             | D | 2 | No         | No         |
|                                                                                         |     | Fumaric acid esters                                            | C | 2 | No         | No         |
|                                                                                         |     | Chlorambucil                                                   | D | 2 | No         | No         |
|                                                                                         |     | Tetracycline-class antibiotics (e.g. doxycycline, minocycline) | E | 2 | No         | No         |
|                                                                                         |     | Allopurinol                                                    | E | 2 | No         | No         |
|                                                                                         |     | Pentoxifylline                                                 | E | 2 | No         | No         |
|                                                                                         |     | Cyclosporine                                                   | E | 2 | Yes        | No         |

|                                                                            |     |                                                                |   |   |                     |            |
|----------------------------------------------------------------------------|-----|----------------------------------------------------------------|---|---|---------------------|------------|
|                                                                            |     | Methotrexate                                                   | E | 2 | No                  | No         |
|                                                                            |     | Hydroxyurea                                                    | E | 2 | No                  | No         |
|                                                                            |     | TNF inhibitors                                                 | D | 2 | No (E,A,I)          | No (E,A,I) |
|                                                                            |     | Rifampicin, ofloxacin, and minocycline                         | D | 2 | No                  | No         |
|                                                                            |     | Defibrotide                                                    | E | 2 | No                  | No         |
| Hidradenitis suppurativa (98 per 100,000) <sup>10</sup>                    | Yes | Tetracycline-class antibiotics (e.g. doxycycline, minocycline) | B | 1 | No                  | No         |
|                                                                            |     | Clindamycin and rifampin                                       | B | 1 | No                  | No         |
|                                                                            |     | Metformin                                                      | C | 2 | No                  | No         |
|                                                                            |     | Acitretin                                                      | C | 2 | No                  | No         |
|                                                                            |     | Spirolactone                                                   | C | 2 | No                  | No         |
|                                                                            |     | Quinolone antibiotics                                          | C | 2 | No                  | No         |
|                                                                            |     | TNF inhibitors                                                 | A | 3 | Yes (A [FDA], E, I) | No (E,A,I) |
|                                                                            |     | Cyclosporine                                                   | D | 3 | No                  | No         |
| Lichen myxedematosus (fewer than 50 cases reported) <sup>11</sup>          | No  | Melphalan                                                      | C | 1 | No                  | No         |
|                                                                            |     | Intravenous Immunoglobulin                                     | C | 1 | No                  | No         |
|                                                                            |     | Bortezomib                                                     | D | 2 | No                  | No         |
|                                                                            |     | Isotretinoin                                                   | D | 2 | No                  | No         |
|                                                                            |     | Cyclophosphamide                                               | E | 3 | No                  | No         |
|                                                                            |     | Cyclosporine                                                   | E | 3 | No                  | No         |
|                                                                            |     | Methotrexate                                                   | E | 3 | No                  | No         |
| Linear IgA bullous dermatosis (1 per 1,000,000 person-years) <sup>12</sup> | Yes | Dapsone                                                        | C | 1 | No                  | No         |
|                                                                            |     | Sulfapyridine                                                  | C | 2 | No                  | No         |
|                                                                            |     | Colchicine                                                     | D | 2 | No                  | No         |
|                                                                            |     | Doxycycline                                                    | E | 2 | No                  | No         |
|                                                                            |     | Methotrexate                                                   | E | 3 | No                  | No         |
|                                                                            |     | Mycophenolate mofetil                                          | E | 3 | No                  | No         |
|                                                                            |     | Azathioprine                                                   | E | 3 | No                  | No         |
|                                                                            |     | Cyclosporine                                                   | E | 3 | No                  | No         |
|                                                                            |     | Intravenous Immunoglobulin                                     | E | 3 | No                  | No         |
|                                                                            |     | Thalidomide                                                    | E | 3 | No                  | No         |
|                                                                            |     | Interferon-alpha                                               | E | 3 | No                  | No         |
| Mucous membrane pemphigoid (2 per 1,000,000 person-years) <sup>13</sup>    | Yes | Dapsone                                                        | C | 1 | Yes                 | No         |
|                                                                            |     | Tetracycline-class antibiotics (e.g. doxycycline, minocycline) | D | 1 | No                  | No         |
|                                                                            |     | Cyclophosphamide                                               | C | 1 | Yes                 | No         |

|                                                                                                           |     |                            |   |   |                      |            |
|-----------------------------------------------------------------------------------------------------------|-----|----------------------------|---|---|----------------------|------------|
|                                                                                                           |     | Mycophenolate mofetil      | C | 2 | No                   | No         |
|                                                                                                           |     | Azathioprine               | D | 2 | Yes                  | No         |
|                                                                                                           |     | Methotrexate               | D | 2 | Yes                  | No         |
|                                                                                                           |     | Cyclosporine               | D | 2 | No                   | No         |
|                                                                                                           |     | Rituximab                  | D | 3 | No                   | No         |
|                                                                                                           |     | Intravenous Immunoglobulin | C | 3 | Yes                  | No         |
|                                                                                                           |     | TNF inhibitors             | E | 3 | Yes (E),<br>No (A,I) | No (E,A,I) |
|                                                                                                           |     | Pentoxifylline             | C | 3 | No                   | No         |
|                                                                                                           |     | Colchicine                 | E | 3 | No                   | No         |
| Palmoplantar pustulosis (1 per 1,000) <sup>14</sup>                                                       | No  | Isotretinoin               | A | 1 | No                   | No         |
|                                                                                                           |     | Acitretin                  | A | 1 | No                   | No         |
|                                                                                                           |     | Cyclosporine               | A | 2 | No                   | Yes        |
|                                                                                                           |     | Methotrexate               | B | 2 | No                   | No         |
|                                                                                                           |     | Fumaric acid esters        | B | 2 | No                   | No         |
| Pemphigus Vulgaris (0.7 per 100,000 person-years) <sup>3</sup>                                            | Yes | Rituximab                  | A | 1 | Yes                  | Yes        |
|                                                                                                           |     | Mycophenolate mofetil      | B | 2 | No                   | No         |
|                                                                                                           |     | Azathioprine               | C | 2 | Yes                  | No         |
|                                                                                                           |     | Intravenous Immunoglobulin | C | 2 | Yes                  | Yes        |
|                                                                                                           |     | Cyclophosphamide           | B | 3 | Yes                  | Yes        |
|                                                                                                           |     | Chlorambucil               | D | 3 | No                   | No         |
| Pityriasis rubra pilaris (0.2% of new patients presenting to dermatologists) <sup>1</sup><br><sub>5</sub> | No  | Acitretin                  | D | 1 | No                   | No         |
|                                                                                                           |     | Isotretinoin               | D | 1 | No                   | Yes        |
|                                                                                                           |     | Methotrexate               | D | 1 | No                   | No         |
|                                                                                                           |     | Cyclosporine               | E | 2 | No                   | No         |
|                                                                                                           |     | TNF inhibitors             | D | 2 | No (E,A,I)           | No (E,A,I) |
|                                                                                                           |     | Ustekinumab                | E | 2 | No                   | No         |
|                                                                                                           |     | Secukinumab                | E | 2 | No                   | No         |
|                                                                                                           |     | Apremilast                 | E | 2 | No                   | No         |
|                                                                                                           |     | Intravenous Immunoglobulin | E | 3 | No                   | No         |
|                                                                                                           |     | Fumaric acid esters        | E | 3 | No                   | No         |
| Prurigo pigmentosa (fewer than 100 cases reported outside of Japan) <sup>16</sup>                         | Yes | Minocycline                | C | 1 | Yes                  | No         |
|                                                                                                           |     | Dapsone                    | C | 2 | No                   | No         |
|                                                                                                           |     | Doxycycline                | E | 2 | No                   | No         |
|                                                                                                           |     | Roxithromycin              | E | 2 | No                   | No         |
|                                                                                                           |     | Clarithromycin             | E | 2 | No                   | No         |
|                                                                                                           |     | Isotretinoin               | E | 3 | No                   | No         |
|                                                                                                           | Yes | Dapsone                    | D | 1 | Yes                  | No         |

|                                                                          |             |                                     |                |    |                      |            |
|--------------------------------------------------------------------------|-------------|-------------------------------------|----------------|----|----------------------|------------|
| Pyoderma gangrenosum<br>(1 per 100,000 person-years) <sup>17</sup>       |             | Minocycline                         | D              | 1  | No                   | No         |
|                                                                          |             | Sulfasalazine                       | D              | 1  | No                   | No         |
|                                                                          |             | Cyclosporine                        | B              | 2  | Yes                  | No         |
|                                                                          |             | TNF inhibitors                      | A              | 3  | Yes (I),<br>No (E,A) | No (E,A,I) |
|                                                                          |             | Cyclophosphamide                    | D              | 3  | No                   | Yes        |
|                                                                          |             | Intravenous Immunoglobulin          | C              | 3  | Yes                  | No         |
|                                                                          |             | Azathioprine                        | D              | 3  | No                   | No         |
|                                                                          |             | Colchicine                          | D              | 3  | No                   | No         |
|                                                                          |             | Thalidomide                         | D              | 3  | Yes                  | Yes        |
|                                                                          |             | Mycophenolate mofetil               | D              | 3  | No                   | No         |
|                                                                          |             | Methotrexate                        | D              | 3  | No                   | No         |
|                                                                          |             | Clofazimine                         | D              | 3  | Yes                  | Yes        |
|                                                                          |             | Isotretinoin                        | E              | 3  | No                   | No         |
|                                                                          |             | Anakinra                            | E              | 3  | No                   | No         |
|                                                                          | Ustekinumab | E                                   | 3              | No | No                   |            |
| Raynaud disease<br>(5 per 100) <sup>18</sup>                             | Yes         | CCB (i.e. nifedepine)               | A              | 1  | Yes                  | Yes        |
|                                                                          |             | Glyceryl trinitrate <sup>19</sup>   | A              | 1  | No                   | No         |
|                                                                          |             | Psotacyclin analogs (i.e. iloprost) | A              | 1  | No                   | No         |
|                                                                          |             | PDE-5 inhibitor (i.e. sildenafil)   | A              | 1  | Yes                  | No         |
|                                                                          |             | SSRI (i.e. fluoxetine)              | B              | 2  | Yes                  | No         |
|                                                                          |             | Bosentan                            | B              | 2  | No                   | No         |
|                                                                          |             | Losartan                            | B              | 2  | Yes                  | No         |
|                                                                          |             | Prazosin                            | A              | 2  | Yes                  | Yes        |
|                                                                          |             | Alprostadil                         | B              | 3  | Yes                  | No         |
|                                                                          |             | Dipyridamole                        | B              | 3  | No                   | No         |
|                                                                          |             | Statins (i.e. atorvastatin)         | A              | 3  | No                   | No         |
|                                                                          | Rituximab   | E                                   | 3              | No | No                   |            |
| Relapsing polychondritis<br>(1 per 1,000,000 person-years) <sup>20</sup> | Yes         | Colchicine                          | C              | 1  | No                   | No         |
|                                                                          |             | Dapsone                             | C              | 1  | Yes                  | No         |
|                                                                          |             | Azathioprine                        | D              | 2  | No                   | No         |
|                                                                          |             | Cyclosporine                        | D              | 2  | No                   | No         |
|                                                                          |             | Methotrexate                        | D              | 2  | No                   | No         |
|                                                                          |             | Mycophenolate mofetil               | D              | 2  | No                   | No         |
|                                                                          |             | Leflunomide                         | D              | 2  | No                   | No         |
|                                                                          |             | Cyclophosphamide                    | E              | 2  | No                   | No         |
|                                                                          |             | Intravenous Immunoglobulin          | E              | 2  | No                   | No         |
|                                                                          |             |                                     | TNF inhibitors | D  | 2                    | No (E,A,I) |

|                                                                    |     |                                                                |    |    |                           |            |
|--------------------------------------------------------------------|-----|----------------------------------------------------------------|----|----|---------------------------|------------|
| Sarcoidosis<br>(5 per 100,000) <sup>21,22</sup>                    | Yes | Hydroxychloroquine                                             | C  | 1  | No                        | No         |
|                                                                    |     | Chloroquine                                                    | B  | 1  | Yes                       | Yes        |
|                                                                    |     | Methotrexate                                                   | B  | 1  | Yes                       | No         |
|                                                                    |     | Mycophenolate mofetil                                          | D  | 2  | No                        | No         |
|                                                                    |     | TNF inhibitors                                                 | B  | 2  | Yes (E, A, I) - if ocular | No (E,A,I) |
|                                                                    |     | Tetracycline-class antibiotics (e.g. doxycycline, minocycline) | D  | 2  | No                        | No         |
|                                                                    |     | Thalidomide                                                    | D  | 3  | Yes                       | Yes        |
|                                                                    |     | Allopurinol                                                    | D  | 3  | No                        | Yes        |
|                                                                    |     | Isotretinoin                                                   | E  | 3  | No                        | No         |
|                                                                    |     | Azathioprine                                                   | E  | 3  | No                        | No         |
|                                                                    |     | Chlorambucil                                                   | B  | 3  | Yes                       | Yes        |
|                                                                    |     | Quinacrine                                                     | D  | 3  | No                        | No         |
|                                                                    |     | Pentoxifylline                                                 | E  | 3  | No                        | No         |
|                                                                    |     | Apremilast                                                     | C  | 3  | No                        | No         |
|                                                                    |     | Leflunomide                                                    | D  | 3  | No                        | No         |
| Dapsone                                                            | E   | 3                                                              | No | No |                           |            |
| Systemic sclerosis / Scleroderma<br>(30 per 100,000) <sup>23</sup> | Yes | Nifedipine                                                     | A  | 1  | No                        | Yes        |
|                                                                    |     | Iloprost                                                       | A  | 1  | No                        | No         |
|                                                                    |     | Losartan                                                       | B  | 1  | No                        | No         |
|                                                                    |     | Sildenafil                                                     | C  | 1  | Yes                       | No         |
|                                                                    |     | Methotrexate                                                   | A  | 2  | No                        | No         |
|                                                                    |     | Cyclophosphamide                                               | B  | 2  | Yes                       | No         |
|                                                                    |     | Acitretin                                                      | C  | 2  | No                        | No         |
|                                                                    |     | Colchicine                                                     | C  | 2  | No                        | No         |
|                                                                    |     | Mycophenolate mofetil                                          | C  | 2  | Yes                       | No         |
|                                                                    |     | Imatinib                                                       | B  | 3  | Yes                       | No         |
|                                                                    |     | Cyclosporine                                                   | C  | 3  | Yes                       | No         |
|                                                                    |     | Rituximab                                                      | C  | 3  | No                        | No         |
|                                                                    |     | Etanercept                                                     | D  | 3  | No                        | No         |



## eReferences

1. Nguyen T, Razzaque Ahmed A. Autoimmune progesterone dermatitis: Update and insights. *Autoimmun Rev.* 2016;15(2):191-197.
2. Calamia KT, Wilson FC, Icen M, Crowson CS, Gabriel SE, Kremers HM. Epidemiology and clinical characteristics of Behçet's disease in the US: a population-based study. *Arthritis Rheum.* 2009;61(5):600-604.
3. Langan SM, Smeeth L, Hubbard R, Fleming KM, Smith CJP, West J. Bullous pemphigoid and pemphigus vulgaris--incidence and mortality in the UK: population based cohort study. *BMJ.* 2008;337:a180.
4. Jarukitsopa S, Hoganson DD, Crowson CS, et al. Epidemiology of systemic lupus erythematosus and cutaneous lupus erythematosus in a predominantly white population in the United States. *Arthritis Care Res.* 2015;67(6):817-828.
5. Bernatsky S, Joseph L, Pineau CA, et al. Estimating the prevalence of polymyositis and dermatomyositis from administrative data: age, sex and regional differences. *Ann Rheum Dis.* 2009;68(7):1192-1196.
6. Spielmann L, Arnaud L, Severac F, et al. Population-based prevalence of eosinophilic fasciitis (Shulman syndrome): a capture-recapture study. *Br J Dermatol.* 2018;179(2):516-517.
7. Bernard P, Vaillant L, Labeille B, et al. Incidence and distribution of subepidermal autoimmune bullous skin diseases in three French regions. Bullous Diseases French Study Group. *Arch Dermatol.* 1995;131(1):48-52.
8. Vañó-Galván S, Molina-Ruiz AM, Fernández-Crehuet P, et al. Folliculitis decalvans: a multicentre review of 82 patients. *J Eur Acad Dermatol Venereol JEADV.* 2015;29(9):1750-1757.
9. Muhlbauer JE. Granuloma annulare. *J Am Acad Dermatol.* 1980;3(3):217-230.
10. Garg A, Kirby JS, Lavian J, Lin G, Strunk A. Sex- and Age-Adjusted Population Analysis of Prevalence Estimates for Hidradenitis Suppurativa in the United States. *JAMA Dermatol.* 2017;153(8):760-764.
11. Luo D-Q, Wu L-C, Liu J-H, Zhang H-Y. Acral persistent papular mucinosis: a case report and literature review. *J Dtsch Dermatol Ges J Ger Soc Dermatol JDDG.* 2011;9(5):354-359.
12. Lings K, Bygum A. Linear IgA bullous dermatosis: a retrospective study of 23 patients in Denmark. *Acta Derm Venereol.* 2015;95(4):466-471.
13. Bertram F, Bröcker E-B, Zillikens D, Schmidt E. Prospective analysis of the incidence of autoimmune bullous disorders in Lower Franconia, Germany. *J Dtsch Dermatol Ges J Ger Soc Dermatol JDDG.* 2009;7(5):434-440.
14. Kubota K, Kamijima Y, Sato T, et al. Epidemiology of psoriasis and palmoplantar pustulosis: a nationwide study using the Japanese national claims database. *BMJ Open.* 2015;5(1):e006450.
15. Griffiths WA. Pityriasis rubra pilaris. *Clin Exp Dermatol.* 1980;5(1):105-112.

16. Oh YJ, Lee M-H. Prurigo pigmentosa: a clinicopathologic study of 16 cases. *J Eur Acad Dermatol Venereol JEADV*. 2012;26(9):1149-1153.
17. Ashchyan HJ, Nelson CA, Stephen S, James WD, Micheletti RG, Rosenbach M. Neutrophilic dermatoses. Part II. Pyoderma gangrenosum and other bowel and arthritis associated neutrophilic dermatoses. *J Am Acad Dermatol*. April 2018.
18. Maricq HR, Carpentier PH, Weinrich MC, et al. Geographic variation in the prevalence of Raynaud's phenomenon: Charleston, SC, USA, vs Tarentaise, Savoie, France. *J Rheumatol*. 1993;20(1):70-76.
19. Overview. AHFS Drug Information. <http://www.ahfsdruginformation.com/off-label-uses-overview/>. Published April 8, 2016. Accessed October 30, 2018.
20. Hazra N, Dregan A, Charlton J, Gulliford MC, D'Cruz DP. Incidence and mortality of relapsing polychondritis in the UK: a population-based cohort study. *Rheumatol Oxf Engl*. 2015;54(12):2181-2187. doi:10.1093/rheumatology/kev240
21. Thomas KW, Hunninghake GW. Sarcoidosis. *JAMA*. 2003;289(24):3300-3303.
22. Marcoval J, Mañá J, Rubio M. Specific cutaneous lesions in patients with systemic sarcoidosis: relationship to severity and chronicity of disease. *Clin Exp Dermatol*. 2011;36(7):739-744.
23. Barnes J, Mayes MD. Epidemiology of systemic sclerosis: incidence, prevalence, survival, risk factors, malignancy, and environmental triggers. *Curr Opin Rheumatol*. 2012;24(2):165-170.
